# Supplementary material
Source: PubMed Central journal article supplement (PMC2268175)

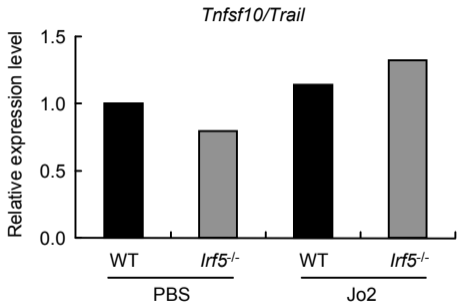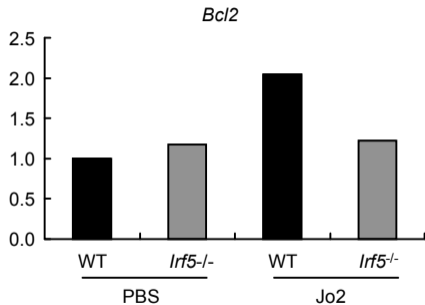

Supplement: supp_0712295105_12295Fig5.pdf [file supp_0712295105_12295Fig5.pdf]
